# Supplementary material for: Box-Behnken optimisation of growth performance, plasma metabolites and carcass traits as influenced by dietary energy, amino acid and starch to lipid ratios in broiler chickens
Source: PLoS One. 2019 Mar 21;14(3):e0213875. doi: 10.1371/journal.pone.0213875 (PMC6428332; doi:10.1371/journal.pone.0213875)
Supplement: S1 Table — (XLS) [file pone.0213875.s001.xls]

## Sheet: 0-21A
PL2016.13
EVONIK
						Starterperiod
compartment.:A						Date:		2016-06-14
start	2016-06-14					till		2016-07-05									Prestarter	prestarter	Starter	Starter	Starter		culling/death
pen	sex	treatment	#1	weight1 (kg)	#2	weight 2 (kg)	fed (kg)	rest feed (kg)	intake (kg)	Ave. Initial BW d 0	Ave. BW d 21	BWG d 0 - 21	Feed intake d 0 -21	FCR d 0 - 21	GAIN	FCR	fed 14 June (kg)	Rest 24 June (kg)	fed 24 June (kg)	fed 1 july (kg)	fed 4 july (kg)		date	pen	number	weight	reason
1	H	OT																					2016-06-18	7	1	0.08	died	* replaced
2	H	T1	15	0.64	15	15.7	15.74	0.46	15.28	42.6667	1046.67	1004	1018.67	1.01461	15.06	1.01461	6	2.26	10	2			2016-06-19	7	1	0.1	died	* replaced
3	H	T2	15	0.64	15	14.9	16.04	0.14	15.9	42.6667	993.333	950.667	1060	1.11501	14.26	1.11501	6	1.96	10	2			2016-06-20	26	1	0.14	died	* replaced
4	H	T3	15	0.64	15	14.52	16.02	0.06	15.96	42.6667	968	925.333	1064	1.14986	13.88	1.14986	6	1.98	10	2			2016-06-21	24	1	0.18	died	* replaced
5	H	T4	15	0.62	15	14.96	16.12	0.08	16.04	41.3333	997.333	956	1069.33	1.11855	14.34	1.11855	6	1.88	10	2			2016-06-21	26	1	0.1	died	* replaced
6	H	T5	15	0.62	15	15.16	15.88	0.38	15.5	41.3333	1010.67	969.333	1033.33	1.06602	14.54	1.06602	6	2.12	10	2			2016-06-22	2	1	0.16	died	* replaced
7	H	T6	15	0.64	15	14.82	15.8	0.14	15.66	42.6667	988	945.333	1044	1.10437	14.18	1.10437	6	2.2	10	2			2016-06-23	3	1	0.22	died	* replaced
8	H	T7	15	0.64	15	15.04	15.78	0.38	15.4	42.6667	1002.67	960	1026.67	1.06944	14.4	1.06944	6	2.22	10	2			2016-06-24	2	1	0.22	died	* replaced
9	H	T8	15	0.66	15	15.06	16.08	0.32	15.76	44	1004	960	1050.67	1.09444	14.4	1.09444	6	1.92	10	2			2016-06-27	29	1	0.5	died	* replaced
10	H	T9	15	0.62	15	14.88	15.76	0.38	15.38	41.3333	992	950.667	1025.33	1.07854	14.26	1.07854	6	2.24	10	2			2016-06-29	5	1	0.24	died	* replaced
11	H	T10	15	0.64	15	14.42	16.08	0.1	15.98	42.6667	961.333	918.667	1065.33	1.15965	13.78	1.15965	6	1.92	10	2			2016-06-29	9	1	0.2	died	* replaced
12	H	T11	15	0.64	15	14.52	16	0.14	15.86	42.6667	968	925.333	1057.33	1.14265	13.88	1.14265	6	2	10	2			2016-06-29	8	1	0.16	culling, too light	* replaced
13	H	T12	15	0.64	15	14.44	16.1	0.16	15.94	42.6667	962.667	920	1062.67	1.15507	13.8	1.15507	6	1.9	10	2			2016-06-30	6	1	0.12	culling, too light	* replaced
14	H	T13	15	0.64	15	14.8	15.98	0.16	15.82	42.6667	986.667	944	1054.67	1.11723	14.16	1.11723	6	2.02	10	2			2016-06-30	27	1	0.56	died	* replaced
15	H	OT																					2016-07-01	3	1	0.72	died	* replaced
16	H	OT																					2016-07-04	17	1	1.02	died	* replaced
17	H	T2	15	0.62	15	14.1	16.34	0.1	16.24	41.3333	940	898.667	1082.67	1.20475	13.48	1.20475	6	1.66	10	2					16
18	H	T1	15	0.62	15	14.82	16.24	0.14	16.1	41.3333	988	946.667	1073.33	1.1338	14.2	1.1338	6	1.76	10	2
19	H	T4	15	0.66	15	14.4	16.26	0.14	16.12	44	960	916	1074.67	1.17322	13.74	1.17322	6	1.74	10	2
20	H	T5	15	0.64	15	15	16.14	0.6	15.54	42.6667	1000	957.333	1036	1.08217	14.36	1.08217	6	1.86	10	2
21	H	T6	15	0.62	15	14.96	16.04	0.28	15.76	41.3333	997.333	956	1050.67	1.09902	14.34	1.09902	6	1.96	10	2
22	H	T7	15	0.62	15	15.68	17.22	0.44	16.78	41.3333	1045.33	1004	1118.67	1.11421	15.06	1.11421	6	1.78	10	2	1
23	H	T8	15	0.6	15	14.54	16.26	0.16	16.1	40	969.333	929.333	1073.33	1.15495	13.94	1.15495	6	1.74	10	2
24	H	T9	15	0.62	15	15.52	15.84	0.44	15.4	41.3333	1034.67	993.333	1026.67	1.03356	14.9	1.03356	6	2.16	10	2
25	H	T10	15	0.62	15	14.7	15.9	0.08	15.82	41.3333	980	938.667	1054.67	1.12358	14.08	1.12358	6	2.1	10	2
26	H	T11	15	0.62	15	15.52	15.84	0.96	14.88	41.3333	1034.67	993.333	992	0.998658	14.9	0.998658	6	2.16	10	2
27	H	T12	15	0.62	15	14.68	16.3	0.08	16.22	41.3333	978.667	937.333	1081.33	1.15363	14.06	1.15363	6	1.7	10	2
28	H	T13	15	0.62	15	14.54	16.32	0.06	16.26	41.3333	969.333	928	1084	1.1681	13.92	1.1681	6	1.68	10	2
29	H	T3	15	0.64	15	15.08	16.18	0.08	16.1	42.6667	1005.33	962.667	1073.33	1.11496	14.44	1.11496	6	1.82	10	2
30	H	OT
			390	16.4	390	386.76			411.8

## Sheet: 0-21B
PL2016.13
EVONIK
						Starterperiod
compartment.:B						Date:		2016-06-14
start	2016-06-14					till		2016-07-05										after replacing animals			Prestarter	Rest Feed	Starter	Starter	Starter		culling/death
pen	sex	treatment	#1	weight1 (kg)	#2	weight 2 (kg)	fed (kg)	rest feed (kg)	intake (kg)	Ave. Initial BW d 0	Ave. BW d 21	BWG d 0 - 21	Feed intake d 0 -21	FCR d 0 - 21		GAIN	FCR	#2	weight 2 (kg)		fed 14 June (kg)	fed 24 June (kg)	fed 24 June (kg)	fed 1 july (kg)	fed 4 july (kg)		date	pen	number	weight	reason
31	H	OT																									2016-06-21	35	1	0.22	died	* replaced
32	H	T5	15	0.62	12	11.44	15.22	2.54	12.68	41.3333	953.333	912	1056.67	1.15863		10.82	1.1719	15	14.46		6	2.78	10	2			2016-06-21	53	1	0.14	died	* replaced
33	H	T6	15	0.62	18	17.46	18.02	0.08	17.94	41.3333	970	928.667	996.667	1.07322		16.84	1.06532	15	14.46		6	0.98	10	2	1		2016-06-22	40	1	0.2	died	* replaced							7.06	5.78
34	H	T7	15	0.62	15	15.4	17.22	0.1	17.12	41.3333	1026.67	985.333	1141.33	1.15832		14.78	1.15832				6	1.78	10	2	1		2016-06-22	49	1	0.16	died	* replaced							7.32	6.04
35	H	T8	15	0.64	15	15.44	15.98	0.5	15.48	42.6667	1029.33	986.667	1032	1.04595		14.8	1.04595				6	2.02	10	2			2016-06-24	58	1	0.2	died	* replaced							7.36	6.08
36	H	T9	15	0.64	15	15.98	17.26	0.14	17.12	42.6667	1065.33	1022.67	1141.33	1.11604		15.34	1.11604				6	1.74	10	2	1		2016-06-30	54	1	0.24	died	* replaced							7.58	6.3
37	H	T10	15	0.64	15	14.8	15.98	0.12	15.86	42.6667	986.667	944	1057.33	1.12006		14.16	1.12006				6	2.02	10	2					1										6.94	5.66
38	H	T11	15	0.64	15	15.8	17.34	0.16	17.18	42.6667	1053.33	1010.67	1145.33	1.13325		15.16	1.13325				6	1.66	10	2	1														7.56	6.28
39	H	T12	15	0.3	15	14.78	16.1	0.18	15.92	20	985.333	965.333	1061.33	1.09945		14.48	1.09945				6	1.9	10	2															7.7	6.42
40	H	T13	15	0.6	15	16	16.08	0.48	15.6	40	1066.67	1026.67	1040	1.01299		15.4	1.01299				6	1.92	10	2															7.38	6.1
41	H	T1	15	0.62	15	14.66	16.16	0.14	16.02	41.3333	977.333	936	1068	1.14103		14.04	1.14103				6	1.84	10	2															7.54	6.26
42	H	T2	15	0.62	15	14.42	16.28	0.14	16.14	41.3333	961.333	920	1076	1.16957		13.8	1.16957				6	1.72	10	2															7.28	6
43	H	T3	15	0.6	15	14.54	15.68	1.06	14.62	40	969.333	929.333	974.667	1.04878		13.94	1.04878				6	2.32	10	2															7.62	6.34
44	H	T4	15	0.6	15	14	17.44	0.06	17.38	40	933.333	893.333	1158.67	1.29701		13.4	1.29701				6	1.56	10	2	1														7.16	5.88
45	H	OT																																					7.4	6.12
46	H	OT																																					7.98	6.7
47	H	T7	15	0.64	15	14.78	16.04	0.06	15.98	42.6667	985.333	942.667	1065.33	1.13013		14.14	1.13013				6	1.96	10	2
48	H	T8	15	0.64	15	14.86	16.26	0.12	16.14	42.6667	990.667	948	1076	1.13502		14.22	1.13502				6	1.74	10	2
49	H	T9	15	0.62	15	15.52	16.14	0.12	16.02	41.3333	1034.67	993.333	1068	1.07517		14.9	1.07517				6	1.86	10	2
50	H	T10	15	0.64	15	15.48	16.22	0.1	16.12	42.6667	1032	989.333	1074.67	1.08625		14.84	1.08625				6	1.78	10	2
51	H	T11	15	0.64	15	14.5	16.24	0.04	16.2	42.6667	966.667	924	1080	1.16883		13.86	1.16883				6	1.76	10	2
52	H	T12	15	0.62	15	15.12	16.18	0.16	16.02	41.3333	1008	966.667	1068	1.10483		14.5	1.10483				6	1.82	10	2
53	H	T13	15	0.62	15	15.6	16.08	0.18	15.9	41.3333	1040	998.667	1060	1.06142		14.98	1.06142				6	1.92	10	2
54	H	T1	15	0.62	15	15.42	15.98	0.32	15.66	41.3333	1028	986.667	1044	1.05811		14.8	1.05811				6	2.02	10	2
55	H	T2	15	0.62	15	16.14	17.3	0.16	17.14	41.3333	1076	1034.67	1142.67	1.10438		15.52	1.10438				6	1.7	10	2	1
56	H	T3	15	0.62	15	15.98	17.32	0.1	17.22	41.3333	1065.33	1024	1148	1.12109		15.36	1.12109				6	1.68	10	2	1
57	H	T4	15	0.66	15	15.74	16.18	0.2	15.98	44	1049.33	1005.33	1065.33	1.05968		15.08	1.05968				6	1.82	10	2
58	H	T5	15	0.62	15	15.88	16	0.12	15.88	41.3333	1058.67	1017.33	1058.67	1.04063		15.26	1.04063				6	2	10	2
59	H	T6	15	0.64	15	14.7	16.24	0.06	16.18	42.6667	980	937.333	1078.67	1.15078		14.06	1.15078				6	1.76	10	2
60	H	OT
			390	15.96	390	394.44			419.5
	32-33	kuikens overgelopen		32	12	dieren
				33	18	dieren

## Sheet: 0-21C
PL2016.13
EVONIK
						Starterperiod
compartment.:C						Date:		2016-06-14
start	2016-06-14					till		2016-07-05										prestarter	Rest Feed	Starter	Starter	Starter		culling/death
pen	sex	treatment	#1	weight1 (kg)	#2	weight 2 (kg)	fed (kg)	rest feed (kg)	intake (kg)	Ave. Initial BW d 0	Ave. BW d 21	BWG d 0 - 21	Feed intake d 0 -21	FCR d 0 - 21	GAIN	FCR		fed 14 June (kg)	fed 24 June (kg)	fed 24 June (kg)	fed 1 july (kg)	fed 4 july (kg)		date	pen	number	weight	reason
61	H	OT																						2016-06-20	77	1	0.12	died	* replaced
62	H	T9	15	0.64	15	15.24	16.08	0.04	16.04	42.6667	1016	973.333	1069.33	1.09863	14.6	1.09863		6	1.92	10	2			2016-06-21	81	1	0.16	died	* replaced
63	H	T10	15	0.62	15	15.64	15.94	0.14	15.8	41.3333	1042.67	1001.33	1053.33	1.05193	15.02	1.05193		6	2.06	10	2			2016-06-22	63	1	0.18	died	* replaced							7.06	5.78
64	H	T11	15	0.62	15	14.84	16.36	0.08	16.28	41.3333	989.333	948	1085.33	1.14487	14.22	1.14487		6	1.64	10	2			2016-06-22	88	1	0.18	died	* replaced							7.32	6.04
65	H	T12	15	0.62	15	15.24	16.46	0.12	16.34	41.3333	1016	974.667	1089.33	1.11765	14.62	1.11765		6	1.54	10	2			2016-06-23	89	1	0.1	died	* replaced							7.36	6.08
66	H	T13	15	0.64	15	15.14	15.96	0.1	15.86	42.6667	1009.33	966.667	1057.33	1.09379	14.5	1.09379		6	2.04	10	2			2016-06-25	65	1	0.38	died	* replaced							7.58	6.3
67	H	T1	15	0.62	15	14.9	16.16	0.06	16.1	41.3333	993.333	952	1073.33	1.12745	14.28	1.12745		6	1.84	10	2			2016-06-29	77	1	0.2	died	* replaced							6.94	5.66
68	H	T2	15	0.64	15	15.2	16.24	0.12	16.12	42.6667	1013.33	970.667	1074.67	1.10714	14.56	1.10714		6	1.76	10	2			2016-06-29	81	1	0.12	died	* replaced							7.56	6.28
69	H	T3	15	0.6	15	15.22	16.02	0.22	15.8	40	1014.67	974.667	1053.33	1.08071	14.62	1.08071		6	1.98	10	2			2016-07-04	78	1	0.6	died	* replaced							7.7	6.42
70	H	T4	15	0.62	15	14.86	16.32	0.12	16.2	41.3333	990.667	949.333	1080	1.13764	14.24	1.13764		6	1.68	10	2					1										7.38	6.1
71	H	T5	15	0.62	15	15.02	16.1	0.12	15.98	41.3333	1001.33	960	1065.33	1.10972	14.4	1.10972		6	1.9	10	2															7.54	6.26
72	H	T6	15	0.62	15	14.82	16.28	0.12	16.16	41.3333	988	946.667	1077.33	1.13803	14.2	1.13803		6	1.72	10	2															7.28	6
73	H	T7	15	0.62	15	16.64	17.36	0.56	16.8	41.3333	1109.33	1068	1120	1.04869	16.02	1.04869		6	1.64	10	2	1														7.62	6.34
74	H	T8	15	0.64	15	14.52	16.22	0.28	15.94	42.6667	968	925.333	1062.67	1.14841	13.88	1.14841		6	1.78	10	2															7.16	5.88
75	H	OT																																		7.4	6.12
76	H	OT																																		7.98	6.7
77	H	T11	15	0.62	15	16.12	15.76	0.56	15.2	41.3333	1074.67	1033.33	1013.33	0.980645	15.5	0.980645		6	2.24	10	2
78	H	T12	15	0.64	15	15.78	16.06	0.22	15.84	42.6667	1052	1009.33	1056	1.04624	15.14	1.04624		6	1.94	10	2
79	H	T13	15	0.62	15	15.34	17.42	0.12	17.3	41.3333	1022.67	981.333	1153.33	1.17527	14.72	1.17527		6	1.58	10	2	1
80	H	T1	15	0.64	15	15.28	16.06	0.14	15.92	42.6667	1018.67	976	1061.33	1.08743	14.64	1.08743		6	1.94	10	2
81	H	T2	15	0.66	15	16.64	15.74	0.64	15.1	44	1109.33	1065.33	1006.67	0.944931	15.98	0.944931		6	2.26	10	2
82	H	T3	15	0.64	15	16.02	17.18	0.34	16.84	42.6667	1068	1025.33	1122.67	1.09493	15.38	1.09493		6	1.82	10	2	1
83	H	T4	15	0.64	15	14.68	16.24	0.02	16.22	42.6667	978.667	936	1081.33	1.15527	14.04	1.15527		6	1.76	10	2
84	H	T5	15	0.64	15	15.56	16.12	0.52	15.6	42.6667	1037.33	994.667	1040	1.04558	14.92	1.04558		6	1.88	10	2
85	H	T6	15	0.64	15	15.2	16.1	0.18	15.92	42.6667	1013.33	970.667	1061.33	1.09341	14.56	1.09341		6	1.9	10	2
86	H	T7	15	0.62	15	14.72	16.24	0.14	16.1	41.3333	981.333	940	1073.33	1.14184	14.1	1.14184		6	1.76	10	2
87	H	T8	15	0.64	15	15.74	17.58	0.26	17.32	42.6667	1049.33	1006.67	1154.67	1.14702	15.1	1.14702		6	1.42	10	2	1
88	H	T9	15	0.62	15	16.28	16	0.12	15.88	41.3333	1085.33	1044	1058.67	1.01405	15.66	1.01405		6	2	10	2
89	H	T10	15	0.64	15	15.86	16.06	0.1	15.96	42.6667	1057.33	1014.67	1064	1.04862	15.22	1.04862		6	1.94	10	2
90	H	OT
			390	16.38	390	400.5			418.62

## Sheet: 0-21D
PL2016.13
EVONIK
						Starterperiod
compartment.:D						Date:		2016-06-14
start	2016-06-14					till		2016-07-05										Prestarter	Rest Feed	Starter	Starter	Starter		culling/death
pen	sex	treatment	#1	weight1 (kg)	#2	weight 2 (kg)	fed (kg)	rest feed (kg)	intake (kg)	Ave. Initial BW d 0	Ave. BW d 21	BWG d 0 - 21	Feed intake d 0 -21	FCR d 0 - 21	GAIN	FCR		fed 14 June (kg)	fed 24 June (kg)	fed 24 June (kg)	fed 1 july (kg)	fed 4 july (kg)		date	pen	number	weight	reason
91	H	OT																						2016-06-17	109	1	0.06	died	* replaced
92	H	T12	15	0.62	15	15.46	16.2	0.08	16.12	41.3333	1030.67	989.333	1074.67	1.08625	14.84	1.08625		6	1.8	10	2			2016-06-19	93	1	0.1	died	* replaced
93	H	T13	15	0.6	15	16.18	17.28	0.12	17.16	40	1078.67	1038.67	1144	1.10141	15.58	1.10141		6	1.72	10	2	1		2016-06-19	100	1	0.08	died	* replaced							7.06	5.78
94	H	T1	15	0.6	15	15.16	16.54	0.24	16.3	40	1010.67	970.667	1086.67	1.11951	14.56	1.11951		6	1.46	10	2			2016-06-20	96	1	0.12	died	* replaced							7.32	6.04
95	H	T2	15	0.62	15	15.12	16.22	0.1	16.12	41.3333	1008	966.667	1074.67	1.11172	14.5	1.11172		6	1.78	10	2			2016-06-20	110	1	0.12	died	* replaced							7.36	6.08
96	H	T3	15	0.62	15	15.3	16.34	0.24	16.1	41.3333	1020	978.667	1073.33	1.09673	14.68	1.09673		6	1.66	10	2			1900-08-03	115	1	0.1	died	* replaced							7.58	6.3
97	H	T4	15	0.6	15	14.9	16.78	0.2	16.58	40	993.333	953.333	1105.33	1.15944	14.3	1.15944		6	1.22	10	2			2016-06-21	118	1	0.1	died	* replaced							6.94	5.66
98	H	T5	15	0.6	15	14.72	16.14	0.14	16	40	981.333	941.333	1066.67	1.13314	14.12	1.13314		6	1.86	10	2			2016-06-21	104	1	0.1	died	* replaced							7.56	6.28
99	H	T6	15	0.66	15	15.02	16.12	0.14	15.98	44	1001.33	957.333	1065.33	1.11281	14.36	1.11281		6	1.88	10	2			2016-06-24	94	1	0.3	died	* replaced							7.7	6.42
100	H	T7	15	0.64	15	14.96	16.2	0.2	16	42.6667	997.333	954.667	1066.67	1.11732	14.32	1.11732		6	1.8	10	2			2016-06-26	103	1	0.14	died	* replaced							7.38	6.1
101	H	T8	15	0.64	15	15.56	17.7	0.16	17.54	42.6667	1037.33	994.667	1169.33	1.1756	14.92	1.1756		6	1.3	10	2	1		2016-06-28	103	1	0.38	died	* replaced							7.54	6.26
102	H	T9	15	0.6	15	14.78	16.3	0.08	16.22	40	985.333	945.333	1081.33	1.14386	14.18	1.14386		6	1.7	10	2			2016-06-29	117	1	0.58	died	* replaced							7.28	6
103	H	T10	15	0.64	15	15.78	16.16	0.84	15.32	42.6667	1052	1009.33	1021.33	1.01189	15.14	1.01189		6	1.84	10	2			2016-06-30	92	1	0.6	died	* replaced							7.62	6.34
104	H	T11	15	0.64	15	16.08	15.94	0.42	15.52	42.6667	1072	1029.33	1034.67	1.00518	15.44	1.00518		6	2.06	10	2			2016-07-01	97	1	0.62	died	* replaced							7.16	5.88
105	H	OT																								14										7.4	6.12
106	H	OT																																		7.98	6.7
107	H	T9	15	0.62	15	15.2	15.96	0.9	15.06	41.3333	1013.33	972	1004	1.03292	14.58	1.03292		6	2.04	10	2
108	H	T10	15	0.62	15	15.06	16.2	0.1	16.1	41.3333	1004	962.667	1073.33	1.11496	14.44	1.11496		6	1.8	10	2
109	H	T11	15	0.6	15	15.72	16.28	0.2	16.08	40	1048	1008	1072	1.06349	15.12	1.06349		6	1.72	10	2
110	H	T12	15	0.6	15	15.98	16.08	0.64	15.44	40	1065.33	1025.33	1029.33	1.0039	15.38	1.0039		6	1.92	10	2
111	H	T13	15	0.62	15	15.1	16.06	0.14	15.92	41.3333	1006.67	965.333	1061.33	1.09945	14.48	1.09945		6	1.94	10	2
112	H	T1	15	0.62	15	15.2	16.2	0.24	15.96	41.3333	1013.33	972	1064	1.09465	14.58	1.09465		6	1.8	10	2
113	H	T2	15	0.64	15	15.26	16.2	0.12	16.08	42.6667	1017.33	974.667	1072	1.09986	14.62	1.09986		6	1.8	10	2
114	H	T3	15	0.6	15	15.4	16.22	0.22	16	40	1026.67	986.667	1066.67	1.08108	14.8	1.08108		6	1.78	10	2
115	H	T4	15	0.64	15	15.84	16.08	0.42	15.66	42.6667	1056	1013.33	1044	1.03026	15.2	1.03026		6	1.92	10	2
116	H	T5	15	0.62	15	15.16	16.36	0.08	16.28	41.3333	1010.67	969.333	1085.33	1.11967	14.54	1.11967		6	1.64	10	2
117	H	T6	15	0.66	15	16.52	16.08	0.44	15.64	44	1101.33	1057.33	1042.67	0.986129	15.86	0.986129		6	1.92	10	2
118	H	T7	15	0.64	15	16.08	16	0.26	15.74	42.6667	1072	1029.33	1049.33	1.01943	15.44	1.01943		6	2	10	2
119	H	T8	15	0.62	15	15.04	16.28	0.08	16.2	41.3333	1002.67	961.333	1080	1.12344	14.42	1.12344		6	1.72	10	2
120	H	T9
			390	16.18	390	400.58			417.12

## Sheet: 0-21E
PL2016.13
EVONIK
						Starterperiod
compartment.:E						Date:		2016-06-14
start	2016-06-14					till		2016-07-05										Prestarter	Rest Feed	Starter	Starter	Starter	Starter				culling/death
pen	sex	treatment	#1	weight1 (kg)	#2	weight 2 (kg)	fed (kg)	rest feed (kg)	intake (kg)	Ave. Initial BW d 0	Ave. BW d 21	BWG d 0 - 21	Feed intake d 0 -21	FCR d 0 - 21	GAIN	FCR		fed 14 June (kg)	fed 24 June (kg)	fed 24 June (kg)	fed 1 july (kg)	fed 4 july (kg)	rest feed (kg)				date	pen	number	weight	reason
121	H	OT																									2016-06-19	129	1	0.1	died	* replaced
122	H	T1	15	0.62	15	15.04	16.12	0.14	15.98	41.3333	1002.67	961.333	1065.33	1.10818	14.42	1.10818		6	1.88	10	2		0.14				2016-06-20	133	1	0.16	died	* replaced
123	H	T2	15	0.64	15	15.16	16.54	0.06	16.48	42.6667	1010.67	968	1098.67	1.13499	14.52	1.13499		6	1.46	10	2		0.06				2016-06-21	144	1	0.12	died	* replaced							7.06	5.78
124	H	T3	15	0.62	15	16.24	17.44	0.1	17.34	41.3333	1082.67	1041.33	1156	1.11012	15.62	1.11012		6	1.56	10	2	1	0.1				2016-06-25	137	1	0.14	died	* replaced							7.32	6.04
125	H	T4	15	0.6	15	16.24	17.2	0.32	16.88	40	1082.67	1042.67	1125.33	1.07928	15.64	1.07928		6	1.8	10	2	1	0.32				2016-06-29	138	1	0.24	died	* replaced							7.36	6.08
126	H	T5	15	0.62	15	15.2	15.98	0.36	15.62	41.3333	1013.33	972	1041.33	1.07133	14.58	1.07133		6	2.02	10	2		0.36				2016-07-24	148	1	0.24	died								7.58	6.3
127	H	T6	15	0.6	15	15.56	16.2	0.22	15.98	40	1037.33	997.333	1065.33	1.06818	14.96	1.06818		6	1.8	10	2		0.22						6										6.94	5.66
128	H	T7	15	0.64	15	16.08	17.64	0.12	17.52	42.6667	1072	1029.33	1168	1.13472	15.44	1.13472		6	1.36	10	2	1	0.12																7.56	6.28
129	H	T8	15	0.6	15	15.1	16.52	0.1	16.42	40	1006.67	966.667	1094.67	1.13241	14.5	1.13241		6	1.48	10	2		0.1																7.7	6.42
130	H	T9	15	0.6	15	15.22	16.28	0.14	16.14	40	1014.67	974.667	1076	1.10397	14.62	1.10397		6	1.72	10	2		0.14																7.38	6.1
131	H	T10	15	0.62	15	16.06	17.46	0.28	17.18	41.3333	1070.67	1029.33	1145.33	1.11269	15.44	1.11269		6	1.54	10	2	1	0.28																7.54	6.26
132	H	T11	15	0.58	15	15.2	16.28	0.18	16.1	38.6667	1013.33	974.667	1073.33	1.10123	14.62	1.10123		6	1.72	10	2		0.18																7.28	6
133	H	T12	15	0.62	15	16.2	16.2	0.3	15.9	41.3333	1080	1038.67	1060	1.02054	15.58	1.02054		6	1.8	10	2		0.3																7.62	6.34
134	H	T13	15	0.6	15	15.88	17.4	0.16	17.24	40	1058.67	1018.67	1149.33	1.12827	15.28	1.12827		6	1.6	10	2	1	0.16																7.16	5.88
135	H	OT																																					7.4	6.12
136	H	OT																																					7.98	6.7
137	H	T2	15	0.58	15	15.82	16.14	0.14	16	38.6667	1054.67	1016	1066.67	1.04987	15.24	1.04987		6	1.86	10	2		0.14
138	H	T1	15	0.6	15	15.66	16.02	0.14	15.88	40	1044	1004	1058.67	1.05445	15.06	1.05445		6	1.98	10	2		0.14
139	H	T4	15	0.6	15	15.18	16.44	0.02	16.42	40	1012	972	1094.67	1.1262	14.58	1.1262		6	1.56	10	2		0.02
140	H	T5	15	0.62	15	15.12	16.1	0.24	15.86	41.3333	1008	966.667	1057.33	1.09379	14.5	1.09379		6	1.9	10	2		0.24
141	H	T6	15	0.6	15	15.52	16.18	0.14	16.04	40	1034.67	994.667	1069.33	1.07507	14.92	1.07507		6	1.82	10	2		0.14
142	H	T7	15	0.6	15	16.18	17.18	0.28	16.9	40	1078.67	1038.67	1126.67	1.08472	15.58	1.08472		6	1.82	10	2	1	0.28
143	H	T8	15	0.6	15	15.52	16.34	0.06	16.28	40	1034.67	994.667	1085.33	1.09115	14.92	1.09115		6	1.66	10	2		0.06
144	H	T9	15	0.6	15	16.24	16.08	0.2	15.88	40	1082.67	1042.67	1058.67	1.01535	15.64	1.01535		6	1.92	10	2		0.2
145	H	T10	15	0.6	15	15.2	16.22	0.16	16.06	40	1013.33	973.333	1070.67	1.1	14.6	1.1		6	1.78	10	2		0.16
146	H	T11	15	0.6	15	15.44	16.22	0.06	16.16	40	1029.33	989.333	1077.33	1.08895	14.84	1.08895		6	1.78	10	2		0.06
147	H	T12	15	0.6	15	15.42	16.18	0.14	16.04	40	1028	988	1069.33	1.08232	14.82	1.08232		6	1.82	10	2		0.14
148	H	T13	15	0.6	14	14.68	16	1	15	40	1048.57	1008.57	1071.43	1.06232	14.08	1.06534		6	2	10	2		1
149	H	T3	15	0.6	15	15.5	16.26	0.04	16.22	40	1033.33	993.333	1081.33	1.08859	14.9	1.08859		6	1.74	10	2		0.04
150	H	OT
			390	15.76	389	404.66			423.52

## Sheet: 21-28A
PL2016.13
EVONIK
					grower period
compartment.:A					Date:		2016-07-05
start	2016-06-14				till		2016-07-12											Grower		culling/mortality
pen	sex	treatment	#2	#3	weight 3 (kg)	fed (kg)	rest feed (kg)	intake (kg)	Ave. Initial BW d 21	Ave. BW d 28	BWG d 21-28	Feed intake d 21-28	FCR d 21-28	weight 2 (kg)	GAIN	FCR		fed 5 july (kg)		date	pen	number	weight	reason
1	H	OT
2	H	T1	15	15	24.64	20	3.12	16.88	1046.67	1642.67	596	1125.33	1.88814	15.7	8.94	1.88814		20				0
3	H	T2	15	15	25.48	20	2.8	17.2	993.333	1698.67	705.333	1146.67	1.62571	14.9	10.58	1.62571		20														7.06	5.78
4	H	T3	15	15	23.58	20	4.14	15.86	968	1572	604	1057.33	1.75055	14.52	9.06	1.75055		20														7.32	6.04
5	H	T4	15	15	25.26	20	4.08	15.92	997.333	1684	686.667	1061.33	1.54563	14.96	10.3	1.54563		20														7.36	6.08
6	H	T5	15	15	25.38	20	3.58	16.42	1010.67	1692	681.333	1094.67	1.60665	15.16	10.22	1.60665		20														7.58	6.3
7	H	T6	15	15	25	20	2.74	17.26	988	1666.67	678.667	1150.67	1.69548	14.82	10.18	1.69548		20														6.94	5.66
8	H	T7	15	15	25.6	20	3.2	16.8	1002.67	1706.67	704	1120	1.59091	15.04	10.56	1.59091		20														7.56	6.28
9	H	T8	15	15	24.96	20	5.02	14.98	1004	1664	660	998.667	1.51313	15.06	9.9	1.51313		20														7.7	6.42
10	H	T9	15	15	24.2	20	5.44	14.56	992	1613.33	621.333	970.667	1.56223	14.88	9.32	1.56223		20														7.38	6.1
11	H	T10	15	15	25.38	20	3.32	16.68	961.333	1692	730.667	1112	1.5219	14.42	10.96	1.5219		20														7.54	6.26
12	H	T11	15	15	26.18	20	3.34	16.66	968	1745.33	777.333	1110.67	1.42882	14.52	11.66	1.42882		20														7.28	6
13	H	T12	15	15	24.92	20	4.46	15.54	962.667	1661.33	698.667	1036	1.48282	14.44	10.48	1.48282		20														7.62	6.34
14	H	T13	15	15	24.86	20	6.02	13.98	986.667	1657.33	670.667	932	1.38966	14.8	10.06	1.38966		20														7.16	5.88
15	H	OT																														7.4	6.12
16	H	OT																														7.98	6.7
17	H	T2	15	15	24.54	20	3.82	16.18	940	1636	696	1078.67	1.54981	14.1	10.44	1.54981		20
18	H	T1	15	15	24.36	20	3.78	16.22	988	1624	636	1081.33	1.70021	14.82	9.54	1.70021		20
19	H	T4	15	15	23.76	20	5.62	14.38	960	1584	624	958.667	1.53632	14.4	9.36	1.53632		20
20	H	T5	15	15	25.74	20	3.22	16.78	1000	1716	716	1118.67	1.56238	15	10.74	1.56238		20
21	H	T6	15	15	25.72	20	3.54	16.46	997.333	1714.67	717.333	1097.33	1.52974	14.96	10.76	1.52974		20
22	H	T7	15	15	25.06	20	4.42	15.58	1045.33	1670.67	625.333	1038.67	1.66098	15.68	9.38	1.66098		20
23	H	T8	15	15	25.14	20	4.84	15.16	969.333	1676	706.667	1010.67	1.43019	14.54	10.6	1.43019		20
24	H	T9	15	15	25.48	20	5.04	14.96	1034.67	1698.67	664	997.333	1.50201	15.52	9.96	1.50201		20
25	H	T10	15	15	24.48	20	3.8	16.2	980	1632	652	1080	1.65644	14.7	9.78	1.65644		20
26	H	T11	15	15	26.84	20	4.52	15.48	1034.67	1789.33	754.667	1032	1.36749	15.52	11.32	1.36749		20
27	H	T12	15	15	24.96	20	4.62	15.38	978.667	1664	685.333	1025.33	1.49611	14.68	10.28	1.49611		20
28	H	T13	15	15	24.84	20	4.8	15.2	969.333	1656	686.667	1013.33	1.47573	14.54	10.3	1.47573		20
29	H	T3	15	15	23.72	20	4.4	15.6	1005.33	1581.33	576	1040	1.80556	15.08	8.64	1.80556		20
30	H	OT
			390	390	650.08			412.32						386.76

## Sheet: 21-28B
PL2016.13
EVONIK
					grower period
compartment.:B					Date:		2016-07-05
start	2016-06-14				till		2016-07-12											Grower		culling/mortality
pen	sex	treatment	#2	#3	weight 3 (kg)	fed (kg)	rest feed (kg)	intake (kg)	Ave. Initial BW d 21	Ave. BW d 28	BWG d 21-28	Feed intake d 21-28	FCR d 21-28	weight 2 (kg)	GAIN	FCR		fed 5 july (kg)		date	pen	number	weight	reason
31	H	OT				0		0												2016-07-06	43	1	0.9	died
32	H	T5	15	15	26.26	20	3.6	16.4	953.333	1750.67	797.333	1093.33	1.37124	11.44	14.82	1.10661		20		2016-07-08	43	1	0.94	died
33	H	T6	15	15	23.98	20	3.26	16.74	970	1598.67	628.667	1116	1.77519	17.46	6.52	2.56748		20				2										7.06	5.78
34	H	T7	15	15	25.9	20	3.7	16.3	1026.67	1726.67	700	1086.67	1.55238	15.4	10.5	1.55238		20														7.32	6.04
35	H	T8	15	15	25.78	20	5.02	14.98	1029.33	1718.67	689.333	998.667	1.44874	15.44	10.34	1.44874		20														7.36	6.08
36	H	T9	15	15	25.96	20	4.94	15.06	1065.33	1730.67	665.333	1004	1.50902	15.98	9.98	1.50902		20														7.58	6.3
37	H	T10	15	15	24.98	20	4.24	15.76	986.667	1665.33	678.667	1050.67	1.54813	14.8	10.18	1.54813		20														6.94	5.66
38	H	T11	15	15	26.94	20	4.58	15.42	1053.33	1796	742.667	1028	1.3842	15.8	11.14	1.3842		20														7.56	6.28
39	H	T12	15	15	25.08	20	4.94	15.06	985.333	1672	686.667	1004	1.46214	14.78	10.3	1.46214		20														7.7	6.42
40	H	T13	15	15	25.68	20	6.24	13.76	1066.67	1712	645.333	917.333	1.42149	16	9.68	1.42149		20														7.38	6.1
41	H	T1	15	15	24.16	20	3.98	16.02	977.333	1610.67	633.333	1068	1.68632	14.66	9.5	1.68632		20														7.54	6.26
42	H	T2	15	15	24.9	20	4.02	15.98	961.333	1660	698.667	1065.33	1.52481	14.42	10.48	1.52481		20														7.28	6
43	H	T3	15	13	22.5	20	6.84	13.16	969.333	1730.77	761.436	1012.31	1.32947	14.54	7.96	1.65327		20														7.62	6.34
44	H	T4	15	15	24.26	20	4.8	15.2	933.333	1617.33	684	1013.33	1.48148	14	10.26	1.48148		20														7.16	5.88
45	H	OT				0		0																								7.4	6.12
46	H	OT				0		0																								7.98	6.7
47	H	T7	15	15	24.06	20	3.72	16.28	985.333	1604	618.667	1085.33	1.75431	14.78	9.28	1.75431		20
48	H	T8	15	15	25.14	20	5.16	14.84	990.667	1676	685.333	989.333	1.44358	14.86	10.28	1.44358		20
49	H	T9	15	15	24.5	20	5.96	14.04	1034.67	1633.33	598.667	936	1.56347	15.52	8.98	1.56347		20
50	H	T10	15	15	25.5	20	3.92	16.08	1032	1700	668	1072	1.60479	15.48	10.02	1.60479		20
51	H	T11	15	15	25.62	20	4.12	15.88	966.667	1708	741.333	1058.67	1.42806	14.5	11.12	1.42806		20
52	H	T12	15	15	25.34	20	4.92	15.08	1008	1689.33	681.333	1005.33	1.47554	15.12	10.22	1.47554		20
53	H	T13	15	15	25.3	20	6.22	13.78	1040	1686.67	646.667	918.667	1.42062	15.6	9.7	1.42062		20
54	H	T1	15	15	24.86	20	3.78	16.22	1028	1657.33	629.333	1081.33	1.71822	15.42	9.44	1.71822		20
55	H	T2	15	15	25.66	20	4.32	15.68	1076	1710.67	634.667	1045.33	1.64706	16.14	9.52	1.64706		20
56	H	T3	15	15	25.24	20	4.2	15.8	1065.33	1682.67	617.333	1053.33	1.70626	15.98	9.26	1.70626		20
57	H	T4	15	15	25.1	20	5.46	14.54	1049.33	1673.33	624	969.333	1.55342	15.74	9.36	1.55342		20
58	H	T5	15	15	26.34	20	2.76	17.24	1058.67	1756	697.333	1149.33	1.64818	15.88	10.46	1.64818		20
59	H	T6	15	15	23.48	20	3.84	16.16	980	1565.33	585.333	1077.33	1.84055	14.7	8.78	1.84055		20
60	H	OT				0		0
			390	388	652.52			401.46

## Sheet: 21-28C
PL2016.13
EVONIK
					grower period
compartment.:C					Date:		2016-07-05
start	2016-06-14				till		2016-07-12											Grower		culling/mortality
pen	sex	treatment	#2	#3	weight3 (kg)	fed (kg)	rest feed (kg)	intake (kg)	Ave. Initial BW d 21	Ave. BW d 28	BWG d 21-28	Feed intake d 21-28	FCR d 21-28	weight 2 (kg)	GAIN	FCR		fed 5 july (kg)		date	pen	number	weight	reason
61	H	OT				0		0												2016-07-09	73	1	1.28	died
62	H	T9	15	15	25.48	20	4.78	15.22	1016	1698.67	682.667	1014.67	1.48633	15.24	10.24	1.48633		20		2016-07-09	84	1	1.38	died
63	H	T10	15	15	25.36	20	3.92	16.08	1042.67	1690.67	648	1072	1.65432	15.64	9.72	1.65432		20				2										7.06	5.78
64	H	T11	15	15	26.02	20	4.14	15.86	989.333	1734.67	745.333	1057.33	1.4186	14.84	11.18	1.4186		20														7.32	6.04
65	H	T12	15	15	24.92	20	4.66	15.34	1016	1661.33	645.333	1022.67	1.58471	15.24	9.68	1.58471		20														7.36	6.08
66	H	T13	15	15	25.94	20	5.3	14.7	1009.33	1729.33	720	980	1.36111	15.14	10.8	1.36111		20														7.58	6.3
67	H	T1	15	15	24.78	20	3	17	993.333	1652	658.667	1133.33	1.72065	14.9	9.88	1.72065		20														6.94	5.66
68	H	T2	15	15	25.6	20	3.7	16.3	1013.33	1706.67	693.333	1086.67	1.56731	15.2	10.4	1.56731		20														7.56	6.28
69	H	T3	15	15	24.24	20	4.8	15.2	1014.67	1616	601.333	1013.33	1.68514	15.22	9.02	1.68514		20														7.7	6.42
70	H	T4	15	15	24.7	20	4.74	15.26	990.667	1646.67	656	1017.33	1.55081	14.86	9.84	1.55081		20														7.38	6.1
71	H	T5	15	15	25.46	20	3.34	16.66	1001.33	1697.33	696	1110.67	1.59579	15.02	10.44	1.59579		20														7.54	6.26
72	H	T6	15	15	23.66	20	3.3	16.7	988	1577.33	589.333	1113.33	1.88914	14.82	8.84	1.88914		20														7.28	6
73	H	T7	15	14	24.68	20	4.69	15.31	1109.33	1762.86	653.524	1093.57	1.67335	16.64	8.04	1.90423		20														7.62	6.34
74	H	T8	15	15	24.76	20	5.38	14.62	968	1650.67	682.667	974.667	1.42773	14.52	10.24	1.42773		20														7.16	5.88
75	H	OT				0		0																								7.4	6.12
76	H	OT				0		0																								7.98	6.7
77	H	T11	15	15	27.4	20	3.84	16.16	1074.67	1826.67	752	1077.33	1.43262	16.12	11.28	1.43262		20
78	H	T12	15	15	24.66	20	5.84	14.16	1052	1644	592	944	1.59459	15.78	8.88	1.59459		20
79	H	T13	15	15	25.36	20	5.66	14.34	1022.67	1690.67	668	956	1.43114	15.34	10.02	1.43114		20
80	H	T1	15	15	24.74	20	3.46	16.54	1018.67	1649.33	630.667	1102.67	1.74841	15.28	9.46	1.74841		20
81	H	T2	15	15	25.82	20	4.52	15.48	1109.33	1721.33	612	1032	1.68627	16.64	9.18	1.68627		20
82	H	T3	15	15	25.22	20	4.66	15.34	1068	1681.33	613.333	1022.67	1.66739	16.02	9.2	1.66739		20
83	H	T4	15	15	24.62	20	4.4	15.6	978.667	1641.33	662.667	1040	1.56942	14.68	9.94	1.56942		20
84	H	T5	15	14	23.94	20	4.76	15.24	1037.33	1710	672.667	1088.57	1.61829	15.56	8.38	1.81862		20
85	H	T6	15	15	25.08	20	3.52	16.48	1013.33	1672	658.667	1098.67	1.66802	15.2	9.88	1.66802		20
86	H	T7	15	15	25.12	20	4.44	15.56	981.333	1674.67	693.333	1037.33	1.49615	14.72	10.4	1.49615		20
87	H	T8	15	15	25.94	20	4.66	15.34	1049.33	1729.33	680	1022.67	1.50392	15.74	10.2	1.50392		20
88	H	T9	15	15	26.32	20	4.86	15.14	1085.33	1754.67	669.333	1009.33	1.50797	16.28	10.04	1.50797		20
89	H	T10	15	15	26.2	20	3.02	16.98	1057.33	1746.67	689.333	1132	1.64217	15.86	10.34	1.64217		20
90	H	OT				0		0
			390	388	656.02			406.61

## Sheet: 21-28D
PL2016.13
EVONIK
					grower period
compartment.:D					Date:		2016-07-05
start	2016-06-14				till		2016-07-12											Grower		culling/mortality
pen	sex	treatment	#2	#3	weight3 (kg)	fed (kg)	rest feed (kg)	intake (kg)	Ave. Initial BW d 21	Ave. BW d 28	BWG d 21-28	Feed intake d 21-28	FCR d 21-28	weight 2 (kg)	GAIN	FCR		fed 5 july (kg)		date	pen	number	weight	reason
91	H	OT																		2016-07-08	110	1	1.24	died
92	H	T12	15	15	25.22	20	4.64	15.36	1030.67	1681.33	650.667	1024	1.57377	15.46	9.76	1.57377		20		2016-07-09	116	1	1.36	died
93	H	T13	15	15	26.7	20	4.7	15.3	1078.67	1780	701.333	1020	1.45437	16.18	10.52	1.45437		20														7.06	5.78
94	H	T1	15	15	23.42	20	4.36	15.64	1010.67	1561.33	550.667	1042.67	1.89346	15.16	8.26	1.89346		20														7.32	6.04
95	H	T2	15	15	24.12	20	6.06	13.94	1008	1608	600	929.333	1.54889	15.12	9	1.54889		20				2										7.36	6.08
96	H	T3	15	15	24.36	20	4.78	15.22	1020	1624	604	1014.67	1.67991	15.3	9.06	1.67991		20														7.58	6.3
97	H	T4	15	15	24.16	20	5.82	14.18	993.333	1610.67	617.333	945.333	1.53132	14.9	9.26	1.53132		20														6.94	5.66
98	H	T5	15	15	24.96	20	3.86	16.14	981.333	1664	682.667	1076	1.57617	14.72	10.24	1.57617		20														7.56	6.28
99	H	T6	15	15	24.46	20	3.56	16.44	1001.33	1630.67	629.333	1096	1.74153	15.02	9.44	1.74153		20														7.7	6.42
100	H	T7	15	15	24.6	20	4.36	15.64	997.333	1640	642.667	1042.67	1.62241	14.96	9.64	1.62241		20														7.38	6.1
101	H	T8	15	15	25.76	20	4.6	15.4	1037.33	1717.33	680	1026.67	1.5098	15.56	10.2	1.5098		20														7.54	6.26
102	H	T9	15	15	24.24	20	5.52	14.48	985.333	1616	630.667	965.333	1.53066	14.78	9.46	1.53066		20														7.28	6
103	H	T10	15	15	24.72	20	4.64	15.36	1052	1648	596	1024	1.71812	15.78	8.94	1.71812		20														7.62	6.34
104	H	T11	15	15	26.3	20	5.18	14.82	1072	1753.33	681.333	988	1.4501	16.08	10.22	1.4501		20														7.16	5.88
105	H	OT																														7.4	6.12
106	H	OT																														7.98	6.7
107	H	T9	15	15	23.58	20	7.06	12.94	1013.33	1572	558.667	862.667	1.54415	15.2	8.38	1.54415		20
108	H	T10	15	15	24.42	20	4.7	15.3	1004	1628	624	1020	1.63462	15.06	9.36	1.63462		20
109	H	T11	15	15	26.38	20	4.76	15.24	1048	1758.67	710.667	1016	1.42964	15.72	10.66	1.42964		20
110	H	T12	15	14	23.84	20	6.8	13.2	1065.33	1702.86	637.524	942.857	1.47894	15.98	7.86	1.67939		20
111	H	T13	15	15	25.58	20	5.44	14.56	1006.67	1705.33	698.667	970.667	1.38931	15.1	10.48	1.38931		20
112	H	T1	15	15	24.4	20	4.06	15.94	1013.33	1626.67	613.333	1062.67	1.73261	15.2	9.2	1.73261		20
113	H	T2	15	15	24.66	20	4.52	15.48	1017.33	1644	626.667	1032	1.64681	15.26	9.4	1.64681		20
114	H	T3	15	15	24.3	20	5.14	14.86	1026.67	1620	593.333	990.667	1.66966	15.4	8.9	1.66966		20
115	H	T4	15	15	24.76	20	6	14	1056	1650.67	594.667	933.333	1.56951	15.84	8.92	1.56951		20
116	H	T5	15	14	23.88	20	3.68	16.32	1010.67	1705.71	695.048	1165.71	1.67717	15.16	8.72	1.87156		20
117	H	T6	15	15	25.92	20	3.46	16.54	1101.33	1728	626.667	1102.67	1.75957	16.52	9.4	1.75957		20
118	H	T7	15	15	26.04	20	3.6	16.4	1072	1736	664	1093.33	1.64659	16.08	9.96	1.64659		20
119	H	T8	15	15	25.36	20	4.52	15.48	1002.67	1690.67	688	1032	1.5	15.04	10.32	1.5		20
120	H	T9				0		0
			390	388	646.14			394.18

## Sheet: 21-28E
PL2016.13
EVONIK
					grower period
compartment.:E					Date:		2016-07-05
start	2016-06-14				till		2016-07-12											Grower	sample grower		culling/mortality
pen	sex	treatment	#2	#3	weight3 (kg)	fed (kg)	rest feed (kg)	intake (kg)	Ave. Initial BW d 21	Ave. BW d 28	BWG d 21-28	Feed intake d 21-28	FCR d 21-28	weight 2 (kg)	GAIN	FCR		fed 5 july (kg)	sample 5 july (kg)		date	pen	number	weight	reason
121	H	OT
122	H	T1	15	15	23.1	19.5	4.16	15.34	1002.67	1540	537.333	1022.67	1.90323	15.04	8.06	1.90323		20	0.5				0
123	H	T2	15	15	23.88	19.48	4.92	14.56	1010.67	1592	581.333	970.667	1.66972	15.16	8.72	1.66972		20	0.52														7.06	5.78
124	H	T3	15	15	24.54	19.54	4.12	15.42	1082.67	1636	553.333	1028	1.85783	16.24	8.3	1.85783		20	0.46														7.32	6.04
125	H	T4	15	15	25.9	19.52	4.12	15.4	1082.67	1726.67	644	1026.67	1.5942	16.24	9.66	1.5942		20	0.48														7.36	6.08
126	H	T5	15	15	24.66	19.46	4.16	15.3	1013.33	1644	630.667	1020	1.61734	15.2	9.46	1.61734		20	0.54														7.58	6.3
127	H	T6	15	15	24.92	19.46	3.2	16.26	1037.33	1661.33	624	1084	1.73718	15.56	9.36	1.73718		20	0.54														6.94	5.66
128	H	T7	15	15	24.16	19.48	4.2	15.28	1072	1610.67	538.667	1018.67	1.89109	16.08	8.08	1.89109		20	0.52														7.56	6.28
129	H	T8	15	15	24.94	19.46	5.06	14.4	1006.67	1662.67	656	960	1.46341	15.1	9.84	1.46341		20	0.54														7.7	6.42
130	H	T9	15	15	24.58	19.5	5.74	13.76	1014.67	1638.67	624	917.333	1.47009	15.22	9.36	1.47009		20	0.5														7.38	6.1
131	H	T10	15	15	25.68	19.46	4.1	15.36	1070.67	1712	641.333	1024	1.59667	16.06	9.62	1.59667		20	0.54														7.54	6.26
132	H	T11	15	15	25.22	19.5	4.82	14.68	1013.33	1681.33	668	978.667	1.46507	15.2	10.02	1.46507		20	0.5														7.28	6
133	H	T12	15	15	25.44	19.56	5.2	14.36	1080	1696	616	957.333	1.55411	16.2	9.24	1.55411		20	0.44														7.62	6.34
134	H	T13	15	15	26.64	19.56	5.12	14.44	1058.67	1776	717.333	962.667	1.34201	15.88	10.76	1.34201		20	0.44														7.16	5.88
135	H	OT																															7.4	6.12
136	H	OT																															7.98	6.7
137	H	T2	15	15	23.42	20	4.78	15.22	1054.67	1561.33	506.667	1014.67	2.00263	15.82	7.6	2.00263		20
138	H	T1	15	15	24.88	20	3.52	16.48	1044	1658.67	614.667	1098.67	1.78742	15.66	9.22	1.78742		20
139	H	T4	15	15	25.8	20	4.18	15.82	1012	1720	708	1054.67	1.48964	15.18	10.62	1.48964		20
140	H	T5	15	15	25.08	20	3.98	16.02	1008	1672	664	1068	1.60843	15.12	9.96	1.60843		20
141	H	T6	15	15	24.74	20	3.78	16.22	1034.67	1649.33	614.667	1081.33	1.75922	15.52	9.22	1.75922		20
142	H	T7	15	15	24.86	20	5.14	14.86	1078.67	1657.33	578.667	990.667	1.71198	16.18	8.68	1.71198		20
143	H	T8	15	15	25.04	20	4.94	15.06	1034.67	1669.33	634.667	1004	1.58193	15.52	9.52	1.58193		20
144	H	T9	15	15	24.98	20	6.12	13.88	1082.67	1665.33	582.667	925.333	1.5881	16.24	8.74	1.5881		20
145	H	T10	15	15	24.68	20	5.02	14.98	1013.33	1645.33	632	998.667	1.58017	15.2	9.48	1.58017		20
146	H	T11	15	15	26.26	20	4.22	15.78	1029.33	1750.67	721.333	1052	1.45841	15.44	10.82	1.45841		20
147	H	T12	15	15	24.96	20	5.38	14.62	1028	1664	636	974.667	1.53249	15.42	9.54	1.53249		20
148	H	T13	14	14	23.22	20	7.62	12.38	1048.57	1658.57	610	884.286	1.44965	14.68	8.54	1.44965		20
149	H	T3	15	15	24.32	20	4.66	15.34	1033.33	1621.33	588	1022.67	1.73923	15.5	8.82	1.73923		20
150	H	OT
			389	389	645.9			391.22

[truncated: 17 more sheets: 28-35A, 28-35B, 28-35C, 28-35D, 28-35E, LTS, date weighing, medication, temperature, HUMIDITY, individual weight, individual weight A, slaughter data 1, individual weight at slaughterh, data animals bloodsampling, slaughter data box weight, FCR per HOUSE]
